# Supplementary material for: RIP-seq reveals LINE-1 ORF1p association with p-body enriched mRNAs
Source: PubMed Central journal article supplement (PMC7874467; doi:10.1186/s13100-021-00233-3), 2021-02-09

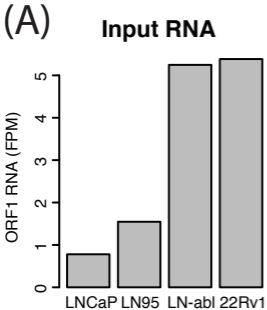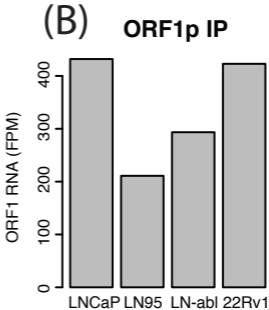

Supplement: 13100_2021_233_MOESM1_ESM.pdf [file 13100_2021_233_MOESM1_ESM.pdf]
